# Supplementary material for: Crude Radix Aconiti Lateralis Preparata (Fuzi) with Glycyrrhiza Reduces Inflammation and Ventricular Remodeling in Mice through the TLR4/NF-κB Pathway
Source: Hindawi journal article supplement (doi:10.1155/2020/5270508), 2020-10-20
Supplement: f1 [file 5270508.f1.pdf]

# Supplementary information

## Crude Radix Aconiti Lateralis Preparata (Fuzi) with *Glycyrrhiza* Reduces Inflammation and Ventricular Remodeling in Mice through TLR4/NF- $\kappa$ B Pathway

Ping Yan <sup>1#</sup>, Wen Mao <sup>3#</sup>, Lushuai Jin<sup>2</sup>, Mingsun Fang<sup>2</sup>, Xia Liu<sup>2</sup>, Jiali Lang<sup>2</sup>, Lu Jin<sup>2</sup>, Beibei Cao<sup>2</sup>, Qiyang Shou<sup>2\*</sup>, Huiying Fu <sup>2\*</sup>

<sup>1</sup> Department of Internal Medicine, University Hospital, Qufu Normal University, Qufu, China

<sup>2</sup> The Second Clinical Medical College, Zhejiang Chinese Medical University, Hangzhou, China

<sup>3</sup> School of Basic Medicine, Zhejiang Chinese Medical University, Hangzhou, China

#These authors contributed equally to this work.

\*The corresponding authors: Huiying Fu, Qiyang Shou.

E-mail: [fhy131@126.com](mailto:fhy131@126.com), [sqy133@126.com](mailto:sqy133@126.com).

SI Table 1 Chemical information for identified compounds of CFZ

| Name                          | Formula                                                      | Mass     | RT    | Score | Area     |
|-------------------------------|--------------------------------------------------------------|----------|-------|-------|----------|
| Adenine                       | C <sub>5</sub> H <sub>5</sub> N <sub>5</sub>                 | 135.0546 | 3.002 | 99.55 | 481590   |
| p-hydroxyphenylpropanol       | C <sub>9</sub> H <sub>10</sub> O <sub>3</sub>                | 166.0633 | 5.613 | 99.48 | 586522   |
| Dimethyl phthalate            | C <sub>10</sub> H <sub>10</sub> O <sub>4</sub>               | 194.0584 | 4.272 | 97.96 | 378158   |
| D(-)-Lyxose                   | C <sub>5</sub> H <sub>10</sub> O <sub>5</sub>                | 150.0534 | 1.052 | 97.81 | 470771   |
| Benzoylmesaconine             | C <sub>31</sub> H <sub>43</sub> NO <sub>10</sub>             | 589.2893 | 7.874 | 97.67 | 79389    |
| Myristic acid                 | C <sub>14</sub> H <sub>28</sub> O <sub>2</sub>               | 228.2097 | 18.14 | 96.87 | 1183470  |
| Shikimic acid                 | C <sub>7</sub> H <sub>10</sub> O <sub>5</sub>                | 174.0536 | 1.625 | 96.83 | 16365449 |
| Benzoylhypaconine             | C <sub>31</sub> H <sub>43</sub> NO <sub>9</sub>              | 573.2945 | 8.606 | 96.6  | 54656    |
| Theobromine                   | C <sub>7</sub> H <sub>8</sub> N <sub>4</sub> O <sub>2</sub>  | 180.0648 | 1.06  | 96.58 | 8714017  |
| Cholic acid                   | C <sub>24</sub> H <sub>40</sub> O <sub>5</sub>               | 408.2887 | 10.21 | 95.77 | 95901    |
| Gentiopicroin                 | C <sub>16</sub> H <sub>2</sub> O <sub>9</sub>                | 356.112  | 4.258 | 94.89 | 398968   |
| Sucrose                       | C <sub>12</sub> H <sub>22</sub> O <sub>11</sub>              | 342.1174 | 1.085 | 94.7  | 253910   |
| Nystose                       | C <sub>24</sub> H <sub>42</sub> O <sub>21</sub>              | 666.2225 | 0.986 | 91.87 | 61577    |
| Isoscopletin                  | C <sub>10</sub> H <sub>8</sub> O <sub>4</sub>                | 192.0412 | 7.524 | 90.98 | 132799   |
| D-(+)-Raffinose               | C <sub>18</sub> H <sub>32</sub> O <sub>16</sub>              | 504.1706 | 1.028 | 88.38 | 145695   |
| Sorbic acid                   | C <sub>6</sub> H <sub>8</sub> O <sub>2</sub>                 | 112.0524 | 1.629 | 87.27 | 556878   |
| L-Lysine                      | C <sub>6</sub> H <sub>14</sub> N <sub>2</sub> O <sub>2</sub> | 146.1059 | 1.003 | 87.11 | 59632    |
| 4'-Hydroxyacetophenone        | C <sub>8</sub> H <sub>8</sub> O <sub>2</sub>                 | 136.0526 | 7.782 | 86.96 | 531822   |
| 5-Hydroxymethyl-2-Furaldehyde | C <sub>6</sub> H <sub>6</sub> O <sub>3</sub>                 | 126.0321 | 1.335 | 86.55 | 21766    |
| $\gamma$ -Aminobutyric acid   | C <sub>4</sub> H <sub>9</sub> NO <sub>2</sub>                | 103.0637 | 1.065 | 86.47 | 50679    |
| $\alpha$ -L-Rhamnose          | C <sub>6</sub> H <sub>12</sub> O <sub>5</sub>                | 164.0697 | 1.038 | 86.34 | 111433   |
| 4-Hydroxybenzoic acid         | C <sub>7</sub> H <sub>6</sub> O <sub>3</sub>                 | 138.0321 | 5.064 | 86.19 | 297038   |

|                                    |                                                               |           |        |       |        |
|------------------------------------|---------------------------------------------------------------|-----------|--------|-------|--------|
| 3,4-Dimethoxybenzoic acid          | C <sub>9</sub> H <sub>10</sub> O <sub>4</sub>                 | 182.0583  | 4.842  | 86.05 | 132271 |
| Fumaric acid                       | C <sub>4</sub> H <sub>4</sub> O <sub>4</sub>                  | 116.0112  | 1.078  | 86.03 | 25153  |
| L-Phenylalanine                    | C <sub>9</sub> H <sub>11</sub> NO <sub>2</sub>                | 165.0795  | 5.29   | 85.87 | 40745  |
| L-Tryptophan                       | C <sub>11</sub> H <sub>12</sub> N <sub>2</sub> O <sub>2</sub> | 204.0904  | 3.902  | 85.84 | 160520 |
| L(+)-Arginine                      | C <sub>6</sub> H <sub>14</sub> N <sub>4</sub> O <sub>2</sub>  | 174.1123  | 1.387  | 85.53 | 216582 |
| Curcumenol                         | C <sub>15</sub> H <sub>22</sub> O <sub>2</sub>                | 234.1625  | 15.411 | 85.48 | 136484 |
| Caffeic acid                       | C <sub>9</sub> H <sub>8</sub> O <sub>4</sub>                  | 180.0429  | 6.984  | 85.47 | 467638 |
| L-Histidine                        | C <sub>6</sub> H <sub>9</sub> N <sub>3</sub> O <sub>2</sub>   | 155.0701  | 1.045  | 85.44 | 190423 |
| (±)-Camphor                        | C <sub>10</sub> H <sub>16</sub> O                             | 152.1204  | 12.938 | 85.38 | 38821  |
| p-Coumaric acid                    | C <sub>9</sub> H <sub>8</sub> O <sub>3</sub>                  | 164.0478  | 4.607  | 85.26 | 50954  |
| Sclareol Glycol                    | C <sub>16</sub> H <sub>30</sub> O <sub>2</sub>                | 254.2253  | 18.719 | 84.94 | 693013 |
| Fructo-<br>oligosaccharide DP7/GF6 | C <sub>42</sub> H <sub>72</sub> O <sub>36</sub>               | 1152.3766 | 0.98   | 84.65 | 13683  |
| 6-Gingerol                         | C <sub>17</sub> H <sub>26</sub> O <sub>4</sub>                | 294.1838  | 11.793 | 84.02 | 36383  |
| 2-Chromanone                       | C <sub>9</sub> H <sub>8</sub> O <sub>2</sub>                  | 148.052   | 7.547  | 83.83 | 36085  |
| Linoleic acid                      | C <sub>18</sub> H <sub>32</sub> O <sub>2</sub>                | 280.2411  | 19.02  | 83.75 | 311995 |
| Salidroside                        | C <sub>14</sub> H <sub>20</sub> O <sub>7</sub>                | 300.1216  | 4.876  | 83.43 | 9723   |
| Butyl p-hydroxybenzoate            | C <sub>11</sub> H <sub>14</sub> O <sub>3</sub>                | 194.0941  | 11.435 | 83.29 | 52332  |
| Methyl 4-hydroxycinnamate          | C <sub>10</sub> H <sub>10</sub> O <sub>3</sub>                | 178.0624  | 3.13   | 83.17 | 52435  |
| Dibutyl phthalate                  | C <sub>16</sub> H <sub>22</sub> O <sub>4</sub>                | 278.1522  | 12.492 | 82.64 | 10731  |
| Isofraxidin                        | C <sub>11</sub> H <sub>10</sub> O <sub>5</sub>                | 222.0527  | 1.604  | 81.95 | 40658  |
| 12-Epinapelline                    | C <sub>22</sub> H <sub>33</sub> NO <sub>3</sub>               | 359.2469  | 5.889  | 80.65 | 41365  |
| Pectolarigenin                     | C <sub>17</sub> H <sub>14</sub> O <sub>6</sub>                | 314.0802  | 9.939  | 80.35 | 27408  |
| Ophiopogonanone C                  | C <sub>19</sub> H <sub>16</sub> O <sub>7</sub>                | 356.0903  | 8.74   | 80.25 | 19555  |
| Bilobalide                         | C <sub>15</sub> H <sub>18</sub> O <sub>8</sub>                | 326.1012  | 4.533  | 80.07 | 14701  |

SI Table 2 Chemical information for identified compounds of CFZ+GC

| Name                    | Formula                                                     | Mass     | RT    | Score | Area     |
|-------------------------|-------------------------------------------------------------|----------|-------|-------|----------|
| p-hydroxyphenylpropanol | C <sub>9</sub> H <sub>10</sub> O <sub>3</sub>               | 166.0631 | 5.613 | 99.49 | 421094   |
| Benzoylmesaconine       | C <sub>31</sub> H <sub>43</sub> NO <sub>10</sub>            | 589.2891 | 7.874 | 98.6  | 48419    |
| p-Coumaric acid         | C <sub>9</sub> H <sub>8</sub> O <sub>3</sub>                | 164.0478 | 2.435 | 97.9  | 385401   |
| D(-)-Lyxose             | C <sub>5</sub> H <sub>10</sub> O <sub>5</sub>               | 150.0534 | 1.052 | 97.89 | 489626   |
| Isoliquiritin           | C <sub>21</sub> H <sub>22</sub> O <sub>9</sub>              | 418.1273 | 5.607 | 97.73 | 73666    |
| Adenine                 | C <sub>5</sub> H <sub>5</sub> N <sub>5</sub>                | 135.0545 | 3.002 | 97.65 | 317450   |
| Myristic acid           | C <sub>14</sub> H <sub>28</sub> O <sub>2</sub>              | 228.2096 | 18.14 | 97.58 | 614712   |
| Shikimic acid           | C <sub>7</sub> H <sub>10</sub> O <sub>5</sub>               | 174.0535 | 1.625 | 97.54 | 16679464 |
| Cholic acid             | C <sub>24</sub> H <sub>40</sub> O <sub>5</sub>              | 408.2884 | 10.21 | 97.38 | 99962    |
| Engeletin               | C <sub>21</sub> H <sub>22</sub> O <sub>10</sub>             | 434.1223 | 7.648 | 97.11 | 103492   |
| Dimethyl phthalate      | C <sub>10</sub> H <sub>10</sub> O <sub>4</sub>              | 194.0586 | 4.272 | 96.97 | 227642   |
| Dihydrodaidzein         | C <sub>15</sub> H <sub>12</sub> O <sub>4</sub>              | 256.0744 | 6.938 | 96.84 | 648056   |
| Theobromine             | C <sub>7</sub> H <sub>8</sub> N <sub>4</sub> O <sub>2</sub> | 180.0648 | 1.06  | 96.55 | 8721984  |
| Sorbic acid             | C <sub>6</sub> H <sub>8</sub> O <sub>2</sub>                | 112.0524 | 1.629 | 95.88 | 571782   |

|                                              |                      |          |        |       |        |
|----------------------------------------------|----------------------|----------|--------|-------|--------|
| Benzoylhypaconine                            | $C_{31}H_{43}NO_9$   | 573.2944 | 8.606  | 95.57 | 22557  |
| Gentiopicrin                                 | $C_{16}H_{20}O_9$    | 356.112  | 4.258  | 95.03 | 254337 |
| Sucrose                                      | $C_{12}H_{22}O_{11}$ | 342.1175 | 1.085  | 94.55 | 222126 |
| Nystose                                      | $C_{24}H_{42}O_{21}$ | 666.2228 | 0.986  | 93.03 | 46180  |
| Isofraxidin                                  | $C_{11}H_{10}O_5$    | 222.0526 | 1.604  | 91.51 | 41913  |
| 8-Methylretusin-7-O-glucopyranoside          | $C_{23}H_{24}O_{10}$ | 460.1381 | 8.147  | 91.43 | 44788  |
| Buddleoside                                  | $C_{28}H_{32}O_{14}$ | 592.1812 | 7.986  | 90.58 | 37211  |
| D-(+)-Raffinose                              | $C_{18}H_{32}O_{16}$ | 504.1703 | 1.028  | 90.39 | 244604 |
| $\alpha$ -L-Rhamnose                         | $C_6H_{12}O_5$       | 164.0697 | 1.038  | 88.55 | 83129  |
| Liguitrigenin-7-O-D-apiosyl-4'-O-D-Glucoside | $C_{26}H_{30}O_{13}$ | 550.171  | 5.674  | 88.49 | 63723  |
| 4'-Hydroxyacetophenone                       | $C_8H_8O_2$          | 136.0526 | 7.782  | 87.41 | 538532 |
| L-Tryptophan                                 | $C_{11}H_{12}N_2O_2$ | 204.0903 | 3.902  | 86.37 | 100963 |
| L-Histidine                                  | $C_6H_9N_3O_2$       | 155.07   | 1.045  | 86.25 | 114543 |
| Butyl p-hydroxybenzoate                      | $C_{11}H_{14}O_3$    | 194.0942 | 11.435 | 86.07 | 47361  |
| 5-Hydroxymethyl-2-Furaldehyde                | $C_6H_6O_3$          | 126.0322 | 1.335  | 86.07 | 16675  |
| Caffeic acid                                 | $C_9H_8O_4$          | 180.0428 | 6.984  | 86.01 | 252536 |
| L-Lysine                                     | $C_6H_{14}N_2O_2$    | 146.1059 | 1.003  | 85.81 | 33357  |
| 3,4-Dimethoxybenzoic acid                    | $C_9H_{10}O_4$       | 182.0583 | 4.842  | 85.61 | 79501  |
| Curcumenol                                   | $C_{15}H_{22}O_2$    | 234.1626 | 15.411 | 85.52 | 132335 |
| Salidroside                                  | $C_{14}H_{20}O_7$    | 300.1213 | 4.876  | 85.03 | 14733  |
| L-Phenylalanine                              | $C_9H_{11}NO_2$      | 165.0794 | 5.29   | 84.99 | 27107  |
| ( $\pm$ )-Camphor                            | $C_{10}H_{16}O$      | 152.1207 | 12.938 | 84.65 | 35483  |
| Sciareol Glycol                              | $C_{16}H_{30}O_2$    | 254.2254 | 18.719 | 84.3  | 511025 |
| Linoleic acid                                | $C_{18}H_{32}O_2$    | 280.241  | 19.02  | 83.55 | 294345 |
| Formononetin                                 | $C_{16}H_{12}O_4$    | 268.0745 | 8.261  | 83.03 | 113556 |
| 6-Gingerol                                   | $C_{17}H_{26}O_4$    | 294.1839 | 11.793 | 82.95 | 31749  |
| Fumaric acid                                 | $C_4H_4O_4$          | 116.0115 | 1.078  | 82.91 | 30631  |
| Pinobanksin                                  | $C_{15}H_{12}O_5$    | 272.0692 | 7.653  | 82.41 | 36677  |
| $\gamma$ -Aminobutyric acid                  | $C_4H_9NO_2$         | 103.0636 | 1.065  | 82.39 | 71610  |
| L(+)-Arginine                                | $C_6H_{14}N_4O_2$    | 174.1122 | 1.387  | 82.38 | 37903  |
| Bilobalide                                   | $C_{15}H_{18}O_8$    | 326.1011 | 3.346  | 81.99 | 39793  |
| Ophiopogonanone C                            | $C_{19}H_{16}O_7$    | 356.0902 | 8.74   | 81.98 | 15359  |
| Methyl gallate                               | $C_8H_8O_5$          | 184.0373 | 1.632  | 81.32 | 42937  |
| Tetrahydrojateorrhizine                      | $C_{20}H_{23}NO_4$   | 341.1638 | 5.52   | 81.15 | 18445  |
| Inosine                                      | $C_{10}H_{12}N_4O_5$ | 268.0806 | 1.067  | 80.98 | 91172  |
